# Supplementary material for: Actin R256 Mono-methylation Is a Conserved Post-translational Modification Involved in Transcription
Source: PubMed Central journal article supplement — Cell Rep. Author manuscript; Available in PMC 2022 Feb 21. (PMC8860185; doi:10.1016/j.celrep.2020.108172), 2020-09-29
Supplement: NIHMS1775293-supplement-supplemental_material.pdf [file NIHMS1775293-supplement-supplemental_material.pdf]

**Cell Reports, Volume 32**

## **Supplemental Information**

### **Actin R256 Mono-methylation**

#### **Is a Conserved Post-translational**

#### **Modification Involved in Transcription**

**Ashok Kumar, Yuan Zhong, Amelie Albrecht, Pau Biak Sang, Adrian Maples, Zhenan Liu, Vinesh Vinayachandran, Rohit Reja, Chia-Fang Lee, Ashutosh Kumar, Jiyuan Chen, Jing Xiao, Bongsoo Park, Jianjun Shen, Bin Liu, Maria D. Person, Kathleen M. Trybus, Kam Y.J. Zhang, B. Franklin Pugh, Kristine E. Kamm, Dianna M. Milewicz, Xuetong Shen, and Prabodh Kapoor**

## Supplemental Information

**Supplementary Table S1: List of PTMs identified through mass spectrometry in yeast cytoplasmic and nuclear actin. Related to Figure 1.**

| Position from N-ter. | Target | Modification | Classification     | Highest PTM Score | Highest Peptide Confidence | Sequence Motif    | Cytoplasmic Actin | Nuclear Actin (INO80) |
|----------------------|--------|--------------|--------------------|-------------------|----------------------------|-------------------|-------------------|-----------------------|
| 3                    | S      | Phospho      | Post-translational | 100               | High                       | MDsEVAALV         | -                 | +                     |
| 28                   | R      | Methyl       | Post-translational | 100               | High                       | AGDDAPrAVF<br>PSI | +                 | -                     |
| 61                   | K      | Methyl       | Post-translational | 100               | High                       | GDEAQSkrGILTL     | +                 | +                     |
| 61                   | K      | Acetyl       | Multiple           | 100               | High                       | GDEAQSkrGILTL     | +                 | +                     |
| 61                   | K      | GlyGly       | Other              | 100               | High                       | GDEAQSkrGILTL     | +                 | -                     |
| 62                   | R      | Methyl       | Post-translational | 100               | High                       | DEAQSkrGILTLR     | +                 | -                     |
| 84                   | K      | Methyl       | Post-translational | 100               | High                       | NWDDMEkiWHHTF     | +                 | +                     |
| 95                   | R      | Methyl       | Post-translational | 100               | High                       | TFYNELrVAPEEH     | +                 | +                     |
| 113                  | K      | Acetyl       | Multiple           | 100               | High                       | EAPMNPkSNREKM     | +                 | +                     |
| 113                  | K      | Methyl       | Post-translational | 100               | High                       | EAPMNPkSNREKM     | +                 | +                     |
| 113                  | K      | GlyGly       | Other              | 100               | High                       | EAPMNPkSNREKM     | +                 | +                     |
| 177                  | R      | Methyl       | Post-translational | 100               | High                       | LPHAILrIDLGR      | -                 | +                     |
| 191                  | K      | GlyGly       | Other              | 100               | High                       | LTDYLMkILSE<br>RG | +                 | +                     |
| 206                  | R      | Methyl       | Post-translational | 100               | High                       | FSTTAERIVRDI      | +                 | +                     |
| 215                  | K      | Methyl       | Post-translational | 100               | High                       | VRDIKEkLCYVAL     | +                 | +                     |
| 215                  | K      | Dimethyl     | Post-translational | 100               | High                       | VRDIKEkLCYVAL     | +                 | +                     |
| 238                  | K      | Methyl       | Post-translational | 100               | High                       | QSSSIEkSYELPD     | -                 | +                     |
| 254                  | R      | Methyl       | Post-translational | 100               | High                       | ITIGNERFRAP<br>EA | +                 | +                     |
| 256                  | R      | Methyl       | Post-translational | 100               | High                       | IGNERFRAP<br>EALF | -                 | +                     |

|     |   |          |                    |     |      |                   |   |   |
|-----|---|----------|--------------------|-----|------|-------------------|---|---|
| 284 | K | GlyGly   | Other              | 100 | High | TYNSIMkCDV<br>DVR | - | + |
| 284 | K | Dimethyl | Post-translational | 100 | High | TYNSIMkCDV<br>DVR | + | + |
| 290 | R | Dimethyl | Post-translational | 100 | High | KCDVDVrKEL<br>YGN | - | + |
| 290 | R | Methyl   | Post-translational | 100 | High | KCDVDVrKEL<br>YGN | + | - |
| 291 | K | GlyGly   | Other              | 100 | High | CDVDVrKELY<br>GNI | + | - |
| 291 | K | Methyl   | Post-translational | 100 | High | CDVDVrKELY<br>GNI | - | + |
| 312 | R | Methyl   | Post-translational | 100 | High | FPGIAErMQKE<br>IT | + | + |
| 315 | K | Methyl   | Post-translational | 100 | High | IAERMQkEITA<br>LA | - | + |
| 326 | K | Acetyl   | Multiple           | 100 | High | LAPSSMkVKII<br>AP | + | + |
| 326 | K | Methyl   | Post-translational | 100 | High | LAPSSMkVKII<br>AP | - | + |
| 326 | K | GlyGly   | Other              | 100 | High | LAPSSMkVKII<br>AP | + | - |
| 328 | K | GlyGly   | Other              | 100 | High | PSSMKVkiIAP<br>PE | + | + |
| 328 | K | Acetyl   | Multiple           | 100 | High | PSSMKVkiIAP<br>PE | - | + |
| 335 | R | Methyl   | Post-translational | 100 | High | IIAPPErKYSV<br>WI | + | - |
| 373 | K | Methyl   | Post-translational | 100 | High | PSIVHHkCF         | + | + |
| 373 | K | GlyGly   | Other              | 100 | High | PSIVHHkCF         | + | - |

**Table S1: Actin PTMs in cytoplasmic and nuclear actin.** Table showing actin PTMs detected by mass spectrometry in yeast cytoplasmic and nuclear actin. Antibodies raised against actin PTMs listed above with the yellow background. Western blot analyses using these actin PTM antibodies are consistent with the mass spectrometry data (See Figure 1). Mutations of residues marked in red color correspond to the mutations of smooth muscle actin *ACTA2* leading to human vascular diseases (See Supplemental Figure S4).

**Supplementary Table S2: Proteins Identified with highest peptide confidence after immunoprecipitation followed by Mass Spectrometry Analyses using actin R256me1 antibody in *Saccharomyces cerevisiae* (strain ATCC 204508 / S288c). Related to Figure 4.**

|               |                                                             |
|---------------|-------------------------------------------------------------|
| <b>ACT1</b>   | <b>Actin</b>                                                |
| <b>RPO21</b>  | <b>DNA-directed RNA polymerase II subunit RPB1</b>          |
| <b>RPB2</b>   | <b>DNA-directed RNA polymerase II subunit RPB2</b>          |
| <b>RPC40</b>  | <b>DNA-directed RNA polymerases I and III subunit RPAC1</b> |
| <b>RPA190</b> | <b>DNA-directed RNA polymerase I subunit RPA190</b>         |
| <b>RPA135</b> | <b>DNA-directed RNA polymerase I subunit RPA135</b>         |
| <b>TAF5</b>   | <b>Transcription initiation factor TFIID subunit 5</b>      |
| <b>INO80</b>  | <b>Chromatin-remodeling ATPase INO80</b>                    |
| RSC8          | Chromatin structure-remodeling complex protein RSC8         |
| RSC30         | Chromatin structure-remodeling complex protein RSC30        |
| SWI5          | Transcriptional factor SWI5                                 |
| SIN3          | Transcriptional regulatory protein SIN3                     |
| PUF3          | mRNA-binding protein PUF3                                   |
| SRO9          | RNA-binding protein SRO9                                    |
| gag-pol       | Probable RNA-directed RNA polymerase virus L-BC             |
| SAM1          | S-adenosylmethionine synthase 1                             |
| DIG1          | Down-regulator of invasive growth 1                         |
| PAN1          | Actin cytoskeleton-regulatory complex protein PAN1          |
| SUB2          | ATP-dependent RNA helicase SUB2                             |
| XRN1          | 5'-3' exoribonuclease 1                                     |
| DHH1          | ATP-dependent RNA helicase DHH1                             |
| DBP5          | ATP-dependent RNA helicase DBP5                             |
| MPH1          | ATP-dependent DNA helicase MPH1                             |
| RAD52         | soform 2 of DNA repair and recombination protein RAD52      |
| RFA1          | Replication factor A protein 1                              |
| RFA2          | Replication factor A protein 2                              |
| MSH6          | DNA mismatch repair protein MSH6                            |
| MSH2          | DNA mismatch repair protein MSH2                            |
| TDA11         | Topoisomerase I damage affected protein 11                  |

|          |                                                         |
|----------|---------------------------------------------------------|
| MGM101   | Mitochondrial genome maintenance protein M              |
| RIM1     | Single-stranded DNA-binding protein RIM1, mitochondrial |
| TY2B-OR1 | Transposon Ty2-OR1 Gag-Pol polyprotein                  |
| TY1B-MR2 | Transposon Ty1-MR2 Gag-Pol polyprotein                  |
| SSC1     | Heat shock protein SSC1, mitochondrial                  |
| HSC82    | ATP-dependent molecular chaperone HSC82                 |
| HSP82    | ATP-dependent molecular chaperone HSP82                 |
| MCM3     | DNA replication licensing factor MCM3                   |
| PDC2     | Protein PDC2                                            |
| CDC16    | Anaphase-promoting complex subunit CDC16                |
| YIL108W  | Putative zinc metalloproteinase YIL108W                 |
| PAT1     | DNA topoisomerase 2-associated protein PAT1             |
| TOP1     | DNA topoisomerase 1                                     |
| NSR1     | Nuclear localization sequence-binding protein           |
| KAP123   | Importin subunit beta-4                                 |
| KAP95    | Importin subunit beta-1                                 |
| SXM1     | Importin beta SMX1                                      |
| SEC7     | Protein transport protein SEC7                          |
| SEC31    | Protein transport protein SEC31                         |
| NUM1     | Nuclear migration protein NUM1                          |
| SEC2     | Rab guanine nucleotide exchange factor SEC2             |
| AKL1     | Serine/threonine-protein kinase AKL1                    |
| NOC2     | Nucleolar complex protein 2                             |
| NET1     | Nucleolar protein NET1                                  |
| NOP56    | Nucleolar protein 56                                    |
| NOP58    | Nucleolar protein 58                                    |
| CUE5     | Ubiquitin-binding protein CUE5                          |
| RPN10    | 6S proteasome regulatory subunit RPN10                  |
| URA2     | Protein URA2                                            |
| CDC19    | Pyruvate kinase 1                                       |
| IKI3     | Elongator complex protein 1                             |

|        |                                                      |
|--------|------------------------------------------------------|
| YEF3   | Elongation factor 3A                                 |
| RPG1   | Eukaryotic translation initiation factor 3 subunit A |
| GCN1   | eIF-2-alpha kinase activator                         |
| RPL3   | 60S ribosomal protein L3                             |
| NIP1   | Eukaryotic translation initiation factor 3 subunit C |
| PRT1   | Eukaryotic translation initiation factor 3 subunit B |
| RPS1B  | 40S ribosomal protein S1-B                           |
| RPL2B  | 60S ribosomal protein L2-B                           |
| RPL27A | 60S ribosomal protein L27-A                          |
| RPL16B | 60S ribosomal protein L16-B                          |
| IKI3   | Elongator complex protein 1                          |
| RPS0B  | 40S ribosomal protein S0-B                           |
| RPS11B | 40S ribosomal protein S11-B                          |
| TIF34  | Eukaryotic translation initiation factor 3 subunit I |
| GCD6   | Translation initiation factor eIF-2B subunit epsilon |
| RPS9B  | 40S ribosomal protein S9-B                           |
| HCR1   | Eukaryotic translation initiation factor 3 subunit J |
| TIF35  | Eukaryotic translation initiation factor 3 subunit   |
| SRP54  | Signal recognition particle subunit SRP54            |
| RPL32  | 60S ribosomal protein L32                            |
| GCD7   | Translation initiation factor eIF-2B subunit beta    |
| VMA1   | V-type proton ATPase catalytic subunit A             |
| VMA2   | V-type proton ATPase subunit B                       |
| ARO1   | Pentafunctional AROM polypeptide                     |
| UGP1   | UTP-glucose-1-phosphate uridylyltransferase          |
| EDE1   | EH domain-containing and endocytosis protein 1       |

**Table S2: Immunoprecipitation followed by Mass spectrometry analyses using actin R256me1 antibodies.** Table showing mass spectrometry results for protein IDs using actin R256me1 antibodies. Experiments were done in triplicates and the peptides with the highest confidence (100%) are presented in the table. Subunits of RNA polymerases and transcription regulators identified are marked in Yellow.

**Supplementary Table S3: RNA-Seq analyses of actin R256C mutant of yeast. Related to Figure 5.**

| Gene Set Name                                     | Size | NES   | FDR q-val |
|---------------------------------------------------|------|-------|-----------|
| <b>Down regulated</b>                             |      |       |           |
| Mitotic sister chromatid segregation              | 103  | -2.54 | 0         |
| Mitotic sister chromatid cohesion                 | 38   | -2.46 | 0         |
| Sister chromatid segregation                      | 111  | -2.37 | 0         |
| Chromosome segregation                            | 198  | -2.34 | 0         |
| DNA dependent DNA replication                     | 122  | -2.32 | 0         |
| Mitotic nuclear division                          | 214  | -2.30 | 0         |
| Double strand break repair                        | 109  | -2.24 | 3.25E-04  |
| Microtubule based process                         | 121  | -2.22 | 2.85E-04  |
| DNA conformation change                           | 89   | -2.22 | 2.53E-04  |
| Microtubule cytoskeleton organization             | 110  | -2.20 | 6.48E-04  |
| Mitotic cell cycle                                | 377  | -2.18 | 5.89E-04  |
| DNA duplex unwinding                              | 30   | -2.15 | 0.0013    |
| Mitotic cell cycle process                        | 365  | -2.14 | 0.0012    |
| Microtubule polymerization or depolymerization    | 37   | -2.14 | 0.0011    |
| Microtubule nucleation                            | 18   | -2.13 | 0.0013    |
| Establishment of sister chromatid cohesion        | 17   | -2.11 | 0.0014    |
| Chromosome condensation                           | 19   | -2.11 | 0.0014    |
| Mitotic cell cycle checkpoint                     | 56   | -2.10 | 0.0018    |
| DNA packaging                                     | 57   | -2.09 | 0.0021    |
| DNA geometric change                              | 31   | -2.09 | 0.0022    |
| DNA replication                                   | 165  | -2.09 | 0.0021    |
| Negative regulation of mitotic cell cycle         | 63   | -2.04 | 0.0038    |
| DNA strand elongation involved in DNA replication | 34   | -2.02 | 0.0043    |
| Cell cycle checkpoint                             | 84   | -2.02 | 0.0041    |
| DNA strand elongation                             | 37   | -2.02 | 0.0043    |
| Protein refolding                                 | 17   | -2.02 | 0.0042    |
| Sister chromatid cohesion                         | 49   | -2.01 | 0.0042    |
| Recombinational repair                            | 67   | -2.01 | 0.0043    |
| Microtubule polymerization                        | 31   | -2.00 | 0.0043    |
| <b>Up regulated</b>                               |      |       |           |
| Translational elongation                          | 97   | 2.85  | 0.0000    |
| Carbohydrate transport                            | 43   | 2.10  | 0.0107    |
| Monosaccharide transport                          | 24   | 2.06  | 0.0183    |

**Table S3:** Genes set enrichment analysis was conducted (GSEA) on RNA-Seq gene expression data of actin R256C mutant compared to WT yeast. Significantly altered GSEA hallmarks are given in the table.

**Supplementary Table S4: Transcriptional profile of the ACTA2: R258C TAAO patient derived fibroblast after RNA-seq analysis. Fibroblast from the healthy volunteers was used as controls. Related to Figure 5 and Supplemental Figure S5.**

© 2000-2015 QIAGEN. down-regulated in MT; up-regulated in MT

| Ingenuity Canonical Pathways                                                 | -log(p-val) | Ratio    | z-score | Molecules                                                                                                                                           | Total Pathway Genes = Molecules/Ratio | Down-reg Genes | Down-reg/Total | Up-reg Genes | Up-reg/Total |
|------------------------------------------------------------------------------|-------------|----------|---------|-----------------------------------------------------------------------------------------------------------------------------------------------------|---------------------------------------|----------------|----------------|--------------|--------------|
| Interferon Signaling                                                         | 6.39E00     | 2.65E-01 | -2.828  | IFIT1, IFITM3, OAS1, MX1, IFI35, STAT2, IRF9, PSMB8, IFITM1                                                                                         | 34                                    | 9              | 0.265          | 0            | 0.000        |
| Hepatic Fibrosis / Hepatic Stellate Cell Activation                          | 5.65E00     | 9.9E-02  |         | CTGF, COL4A1, COL8A1, COL4A2, CCL5, COL15A1, PGF, MYL7, COL5A3, CCL2, TIMP1, TNFSF12, CD70, TNFSF9, IGFBP3, TGFB2, COL11A1, COL18A1, TNFRSF1B, MMP1 | 202                                   | 12             | 0.059          | 8            | 0.040        |
| Death Receptor Signaling                                                     | 4.11E00     | 1.2E-01  | -0.905  | HSPB3, TNFSF12, HSPB2, PARP10, PARP12, ACTG2, TNFRSF1B, ACTC1, PARP9, ACTA1, PARP14                                                                 | 92                                    | 9              | 0.098          | 2            | 0.022        |
| Virus Entry via Endocytic Pathways                                           | 3.98E00     | 1.16E-01 |         | DNM1, FYN, CD55, ITGA3, RRAS2, HLA-C, ITGA2, HLA-B, ACTG2, ACTC1, ACTA1                                                                             | 95                                    | 8              | 0.084          | 3            | 0.032        |
| Eicosanoid Signaling                                                         | 3.86E00     | 1.22E-01 | -1.000  | PTGIS, PLA2G1B, PTGFR, AKR1C3, LTC4S, PLA2G4C, RARRES3, ALOX5AP, PTGS2, PTGER1                                                                      | 82                                    | 8              | 0.098          | 2            | 0.024        |
| Agranulocyte Adhesion and Diapedesis                                         | 3.8E00      | 8.42E-02 |         | CLDN11, MMP3, ITGA2, CCL5, CXCL6, MYL7, ITGA3, CCL2, EZR, CXCL14, PODXL, CCL26, ACTG2, ACTC1, ACTA1, MMP1                                           | 190                                   | 8              | 0.042          | 8            | 0.042        |
| Caveolar-mediated Endocytosis Signaling                                      | 3.56E00     | 1.23E-01 |         | FYN, CD55, ITGA3, HLA-C, ITGA2, HLA-B, ACTG2, ACTC1, ACTA1                                                                                          | 73                                    | 7              | 0.096          | 2            | 0.027        |
| Role of Pattern Recognition Receptors in Recognition of Bacteria and Viruses | 3.44E00     | 9.45E-02 | -2.449  | IFIH1, OAS1, IRF7, OAS2, IL17D, DDX58, CASP1, TGFB2, CCL5, EIF2AK2, OAS3, IL11                                                                      | 127                                   | 10             | 0.079          | 2            | 0.016        |
| Aryl Hydrocarbon Receptor Signaling                                          | 3.43E00     | 8.9E-02  |         | HSPB3, ALDH1B1, GSTM1, GSTM5, GSTM3, NQO2, HSPB2, CCND1, CYP1B1, GSTT1, GSTT2/GSTT2B, ALDH1A1, TGFB2                                                | 101                                   | 9              | 0.089          | 4            | 0.040        |
| Cell Cycle: G2/M DNA Damage Checkpoint Regulation                            | 3.28E00     | 1.43E-01 | 2.646   | CDC25B, CKS1B, TOP2A, CCNB2, PLK1, AURKA, CCNB1                                                                                                     | 49                                    | 7              | 0.143          | 0            | 0.000        |





**Figure S1: Western blot analysis and rescue experiment of actin R256C mutant yeast strains, and sequence alignment of actin from different organisms. Related to Figure 1, Figure 2, and Figure 3.** (A), Western blot analysis of the whole cell yeast extract after probing with actin R256me1 antibodies (left panel), the blot was stripped off and stained with anti-actin (C4) antibodies (right panel). Actin R256me1 antibodies detects a single band at the molecular size of actin (~42 kDa), similar to anti-actin (C4) antibodies in the whole cell yeast extract. (B), Western blot analysis of the whole cell yeast extract from WT and R256C mutant strains after probing with actin R256me1 antibodies (upper panel), and anti-actin (C4) antibodies (lower panel). Actin R256me1 antibodies detects a single band at the molecular size of actin (~42 kDa), similar to anti-actin (C4) antibodies in the whole cell yeast extract from WT strains. However, actin R256me1 antibodies do not detect any band in the whole cell yeast extract from *act1:R256C* mutant strains. (C), Phenotypic analyses on YEPD and HU (100mM) plate at permissive temperature (30 °C), showing the recovery of growth of the actin R256C mutants in the presence of a plasmid expressing the wild type actin (pRS415-ACT1). (D), For amino acid sequence alignment ClustalW analyses of Yeast actin (Act1), Human  $\beta$ -actin, and *Drosophila melanogaster* actin isoform B was done. Amino acid numbers at the bottom of the sequences are the residues that are observed to be posttranslationally modified through mass spectrometry in the yeast nuclear actin (See Table S1). All of these residues except Serine-3 are found to be conserved from yeast to human.

Figure S2

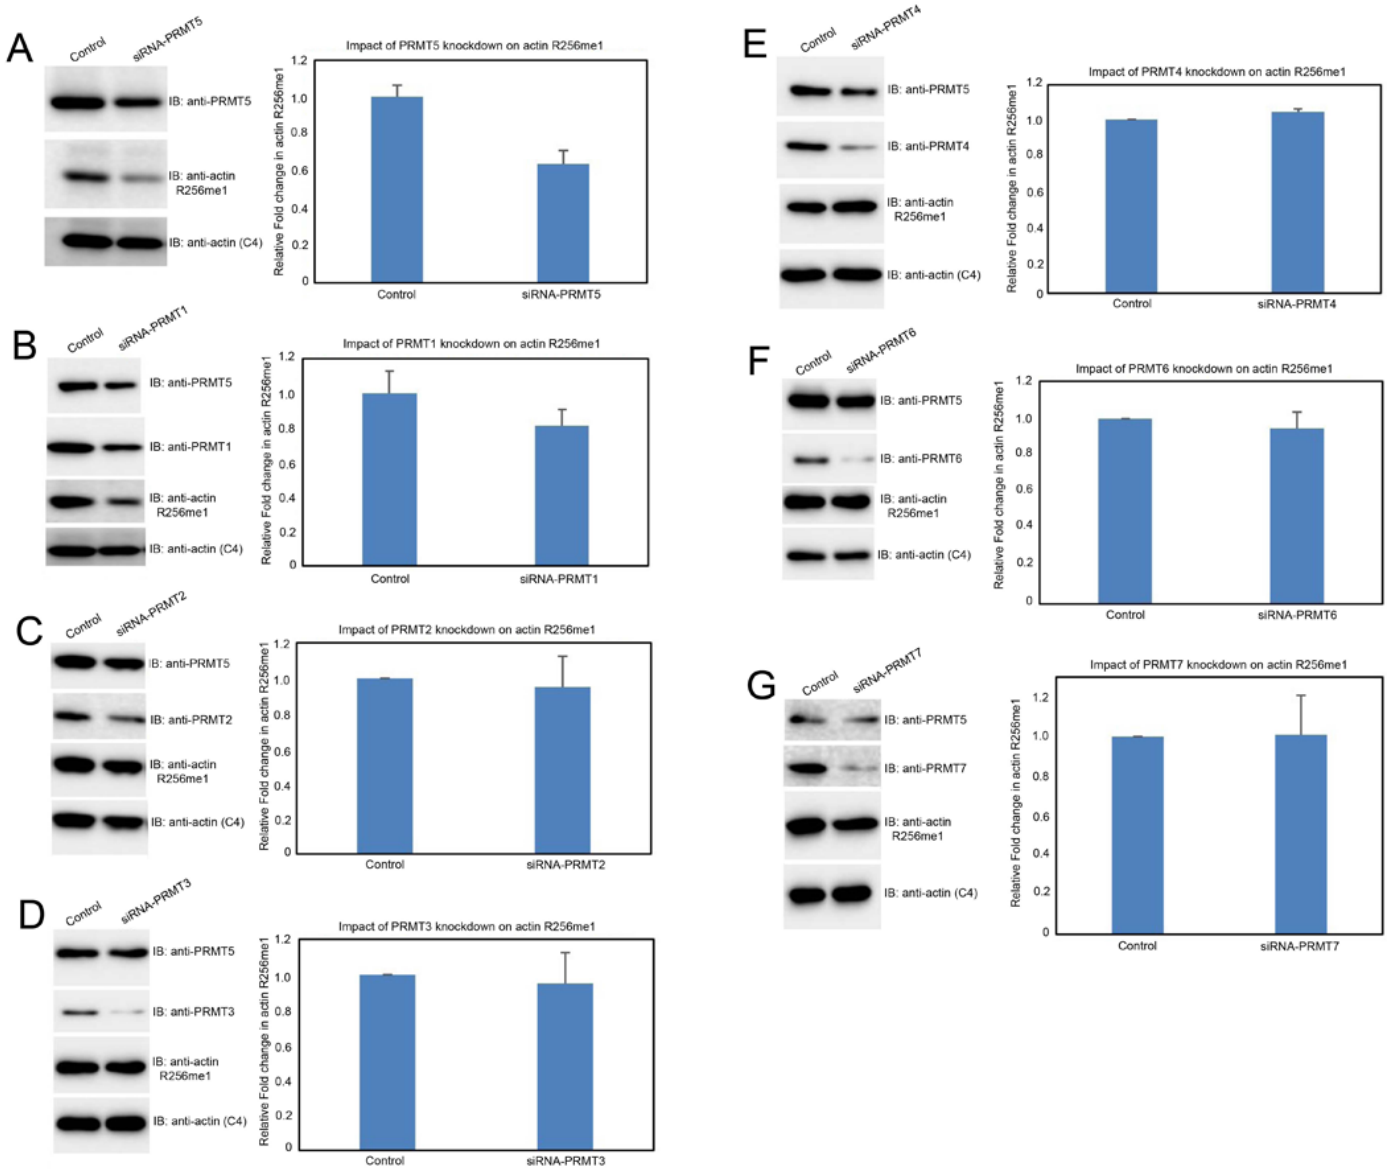

**Figure S2: Knockdown of PRMTs show that PRMT5 is required for actin R256 methylation (R258 in human actin) in HEK293 cells. Related to Figure 3.**

(A-G), Left panel; Western blot analyses of the whole cell extract of HEK293 cells transfected with siRNA against individual PRMTs as mentioned at the top, using antibodies indicated at the right. Right Panel; Graph shows the relative folds change in actin R256me1 level (R258 in human actins) after siRNA of individual PRMTs in HEK293 cells. Data presented is the mean of three independent experiments.

Figure S3

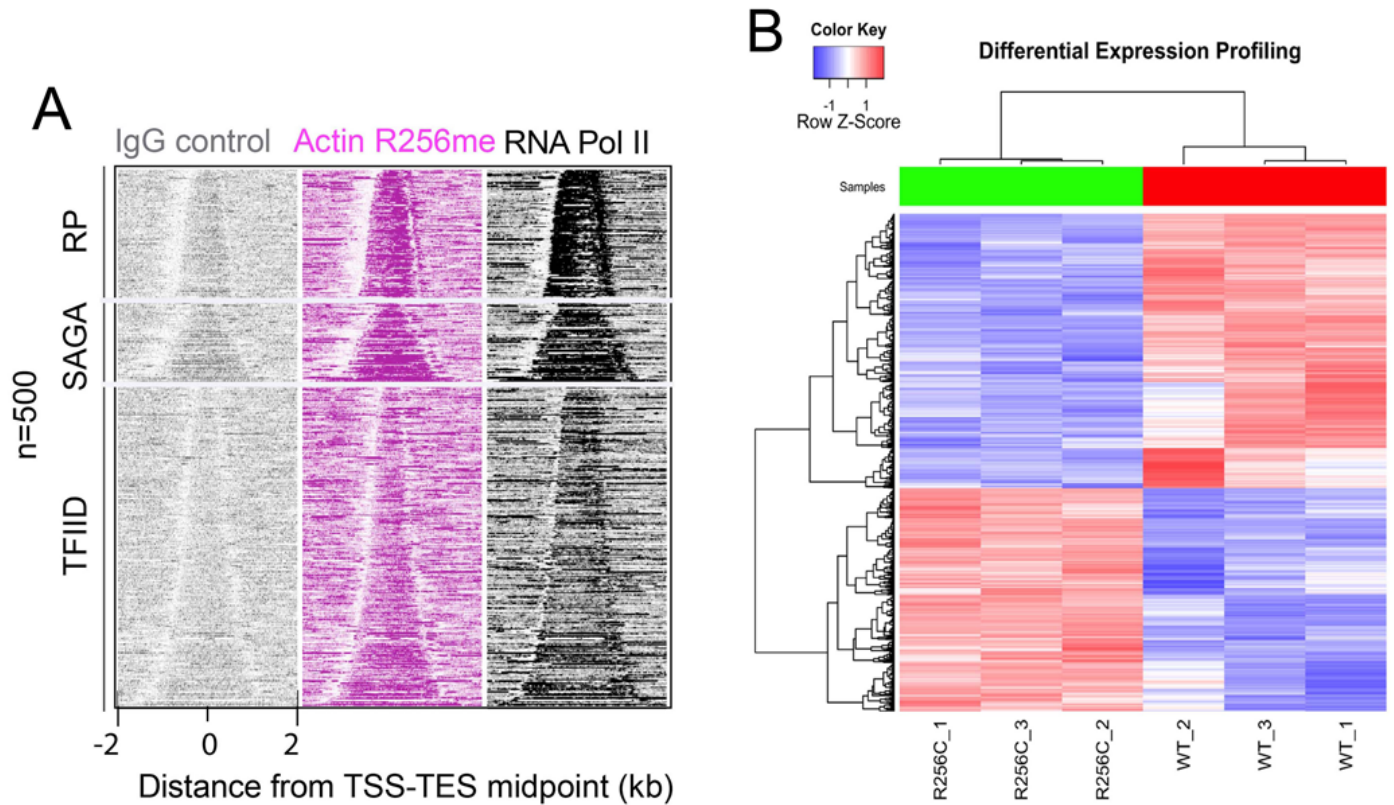

**Figure S3: ChIP-exo analysis of yeast genome using actin R256me1 antibodies, and differential expression profiling of WT and actin R256C mutant yeast strains. Related to Figure 4, and Figure 5.** (A), Bell plots showing shifted 5' tag ends for actin R256me, IgG control, and RNA polymerase II aligned by the midpoint of Transcription Start Site (TSS) and Transcription End Site (TES) of 500 significantly enriched genes, grouped into Ribosomal Protein (RP), SAGA, and TFIIID genes sorted by gene length in each group. (B), A hierarchically clustered heatmap showing the expression patterns of the differentially expressed genes (fold change  $\geq 2$ ) for the three biological replicates of WT and actin R256C mutant yeast strain. Red and blue color represents up- and down-regulated expression respectively. Color density indicating levels of fold change is displayed. Pearson distance correlation was calculated and Z-score is shown in the bar graph at the top. Complete hierarchical clustering was used for grouping.

**Figure S4**

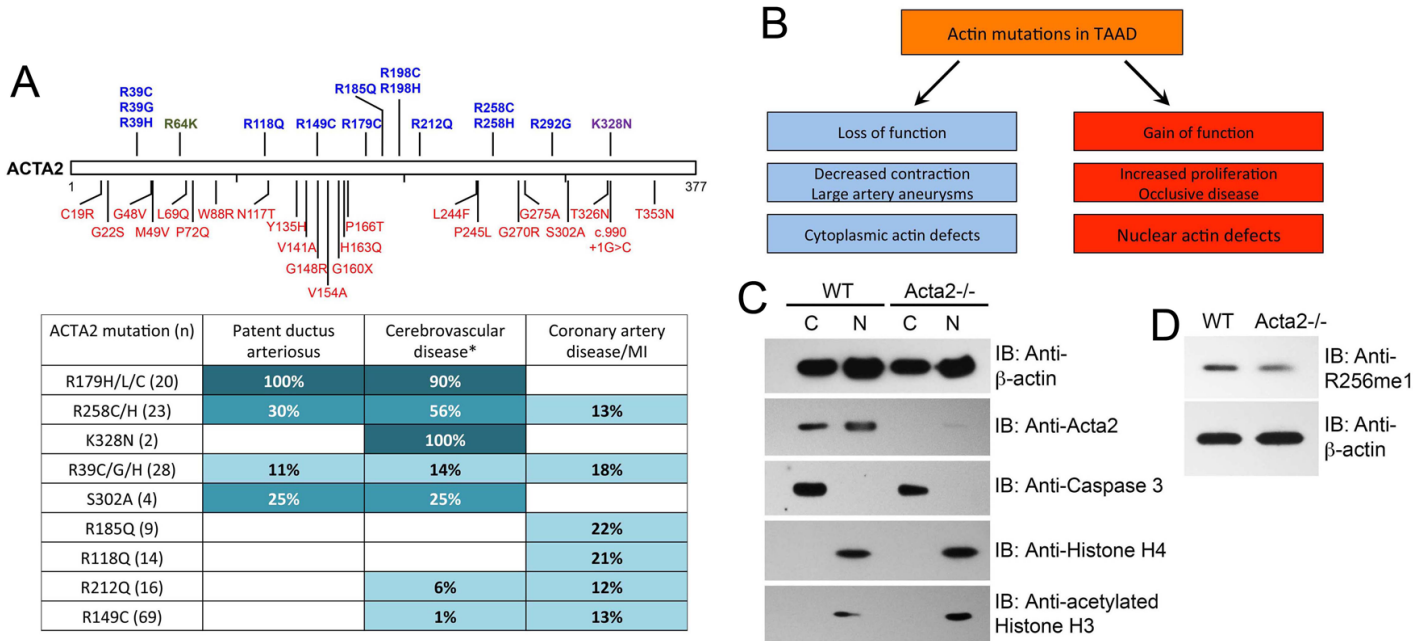

**Figure S4: TAAD causing mutants of *ACTA2*. Related to Figure 5.** (A), Table showing TAAD causing *ACTA2* mutations and their respective phenotypes. (B), Model showing gain of function mutations in *ACTA2* that cause TAAD in human were explained by cytoplasmic actin defects, however those TAAD causing *ACTA2* mutations that result in loss of function could be explained by the defects in the nuclear functions of actin. (C), Western blot analysis of cytoplasmic and nuclear fractions of WT and *Acta2*<sup>-/-</sup> smooth muscle cells from mice using antibodies as indicated. Actin (C4) was used for loading control, caspase3 was used for cytoplasmic fraction marker, histone H4 and acetylated Histone H3 were used as nuclear fraction markers. (D), Western blot analysis of nuclear fractions of WT and *Acta2*<sup>-/-</sup> smooth muscle cells from mice using antibodies as indicated. Actin (C4) was used for loading control.

Figure S5

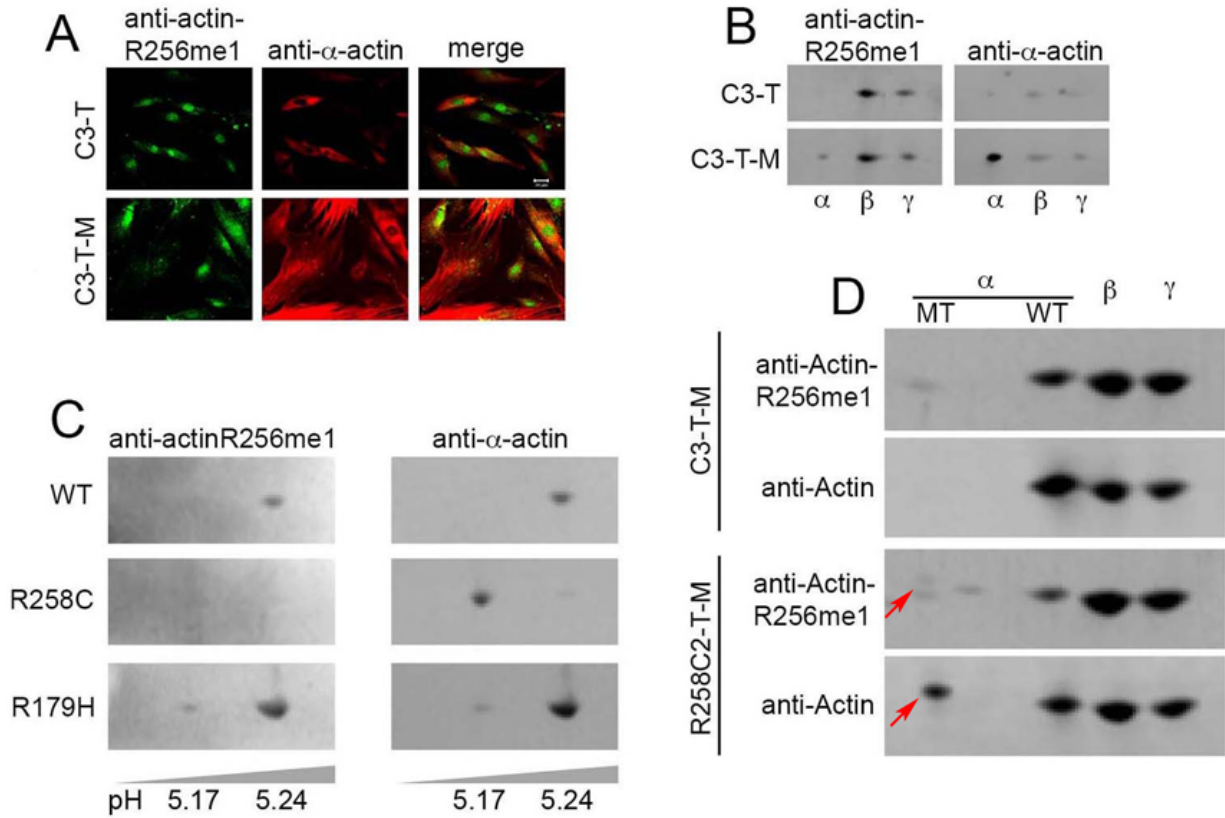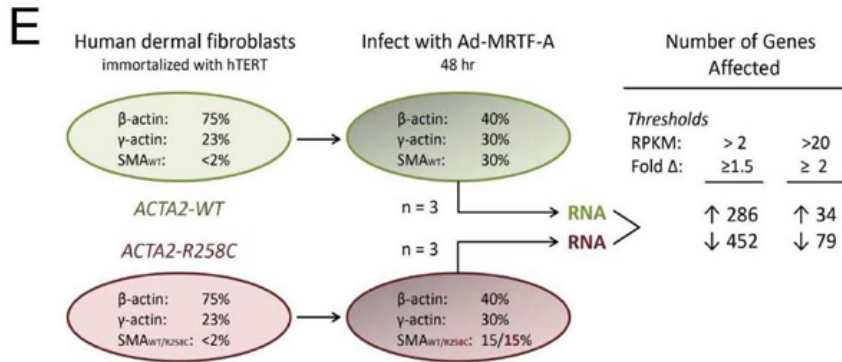

| Ingenuity Canonical Pathways with $p < 0.0001$     |                   |                          |                                |
|----------------------------------------------------|-------------------|--------------------------|--------------------------------|
| PATHWAY                                            | $-\log$ (p-value) | % Pathway Genes Affected | Number of Genes Up/Down: Total |
| Interferon Signaling                               | 6.39              | 26.5                     | 0/9: 34                        |
| Hepatic Fibrosis/ Hepatic Stellate Cell Activation | 5.65              | 9.9                      | 8/12: 202                      |
| Death Receptor Signaling                           | 4.11              | 12.0                     | 2/9: 92                        |
| RPKM >20, Fold $\Delta \geq 2$                     |                   |                          |                                |
| Interferon Signaling                               | 6.34              | 14.7                     | 0/5: 34                        |
| Glutathione-mediated Detoxification                | 4.44              | 9.8                      | 1/3: 41                        |
| Cell Cycle: G2/M DNA Damage Checkpoint Regulation  | 4.13              | 8.2                      | 0/4: 49                        |

**Figure S5: Mutation of smooth muscle  $\alpha$ -actin, ACTA2-R258C (R256C in yeast actin), abrogates methylation and affects mRNA expression profile in R258C TAAD patient fibroblasts. Related to Figure 5.**

(A), Immunofluorescence images of fibroblast showing R258me1-actin staining in the nucleus. R258me1-actin is enriched in nuclei of human fibroblasts before (C3-T) and after (C3-T-M) induction of SM- $\alpha$ -actin. R258me1-actin, green; SM- $\alpha$ -actin, red; scale bar 20  $\mu$ M. (B), Western blot analysis of 2D gel of nuclear fractions from patient derived fibroblast. Membrane was first probed with actin R256me1 antibodies (1:100), followed by SM- $\alpha$ -actin antibodies (1:10,000) after washing with TBST. Actin isoforms are labeled. (C), Western blot analysis of 2D gel of purified recombinant WT-, R258C- and R179H-SM- $\alpha$ -actin with calculated isoelectric points: WT=5.24, R258C=5.17 and R179H=5.23. Blots were probed with actin R256me1 antibodies (1:500) followed by SM- $\alpha$ -actin antibodies (1:20,000) after stripping. Protein loading: 0.8 $\mu$ g WT-SM- $\alpha$ -actin; 0.8 $\mu$ g R258C-SM- $\alpha$ -actin. 0.9 $\mu$ g R179H-sm- $\alpha$ -actin. (D), Western blot analysis of 2D gel actin isoforms from Ad-MRTF-A infected WT (C3-T-M) and R258C (R258C2-T-M) mutant (MT) fibroblasts. Membrane was first probed with actin R256me1 antibodies (1:100), followed by SM- $\alpha$ -actin antibodies (1:10,000) after stripping with TBST. Presented here is the representative blot of 3 experiments on independent cell preparations. (E), R258C mutation in ACTA2 affects the transcriptional profile of human dermal fibroblasts. Top Panel. Schematic of protocol of sample preparation for RNA-Seq. Lower Panel: Table of Ingenuity Canonical Pathways with  $p < 0.0001$  at both low (RPKM  $> 2$ , Fold change ( $\Delta$ )  $\geq 1.5$ ) and high (RPKM  $> 20$ ,  $\Delta \geq 2$ ) stringency.



Figure S6

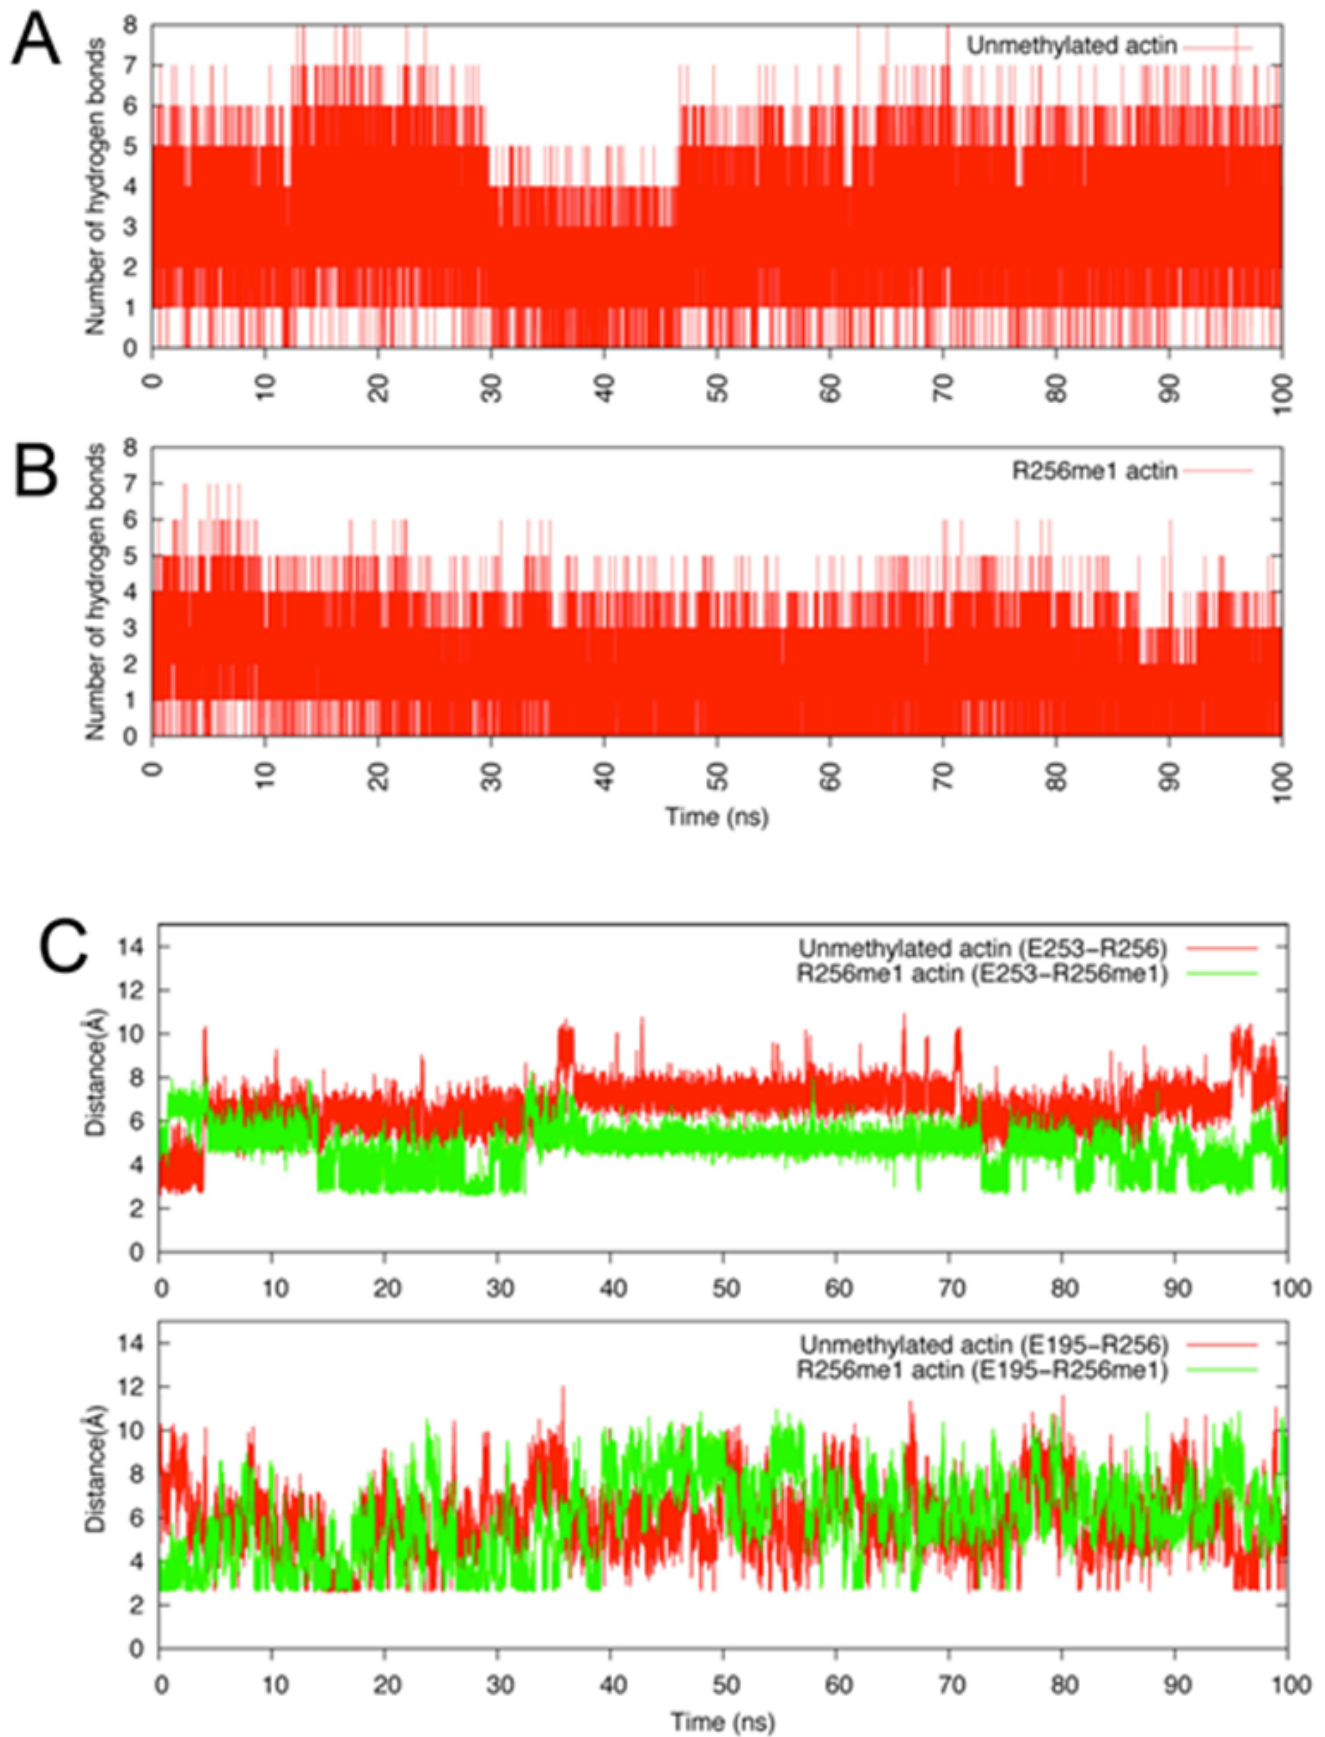



**Figure S6: MD Simulation analysis. Related to Figure 6.** (A-B), Presented here is the total number of inter-molecular hydrogen bond interactions between ATP; and (A), wild-type actin (unmethylated), and (B), methylated actin (actin R256me1). (C), Presented here is the distance between OE1 atom of E253 or E195 and NH2 of R256 monitored as a function of MD simulation time. Please also see Figure 6.
